# Supplementary material
Source: PubMed Central journal article supplement (PMC5489124)

**SUGGESTED ELECTRONIC APPENDIX****Table S1:** Multivariate analysis of fully adjusted (for case-mix, MICS and transplant covariates) logistic regression models showing pre-transplant BMI and OR (and 95% CI as error bars) of delayed graft function for each standard deviation higher BMI in different sub-group of patients

| Subgroups                       | Case-mix & MICS & Transplant data adjusted model |         |
|---------------------------------|--------------------------------------------------|---------|
|                                 | OR (95% CI)                                      | P-value |
| Age $\geq$ 50 years             | 1.36 (1.23-1.50)                                 | <0.001  |
| Age<50 years                    | 1.35 (1.23-1.49)                                 | <0.001  |
| Interaction term for age        | -                                                | 0.398   |
| Male                            | 1.28 (1.18-1.40)                                 | <0.001  |
| Female                          | 1.47 (1.32-1.63)                                 | <0.001  |
| Interaction term for gender     | -                                                | 0.137   |
| Presence of diabetes            | 1.19 (1.05-1.35)                                 | 0.006   |
| Absence of diabetes             | 1.41 (1.30-1.53)                                 | <0.001  |
| Interaction term for diabetes   | -                                                | 0.014   |
| Black                           | 1.35 (1.21-1.51)                                 | <0.001  |
| White                           | 1.44 (1.30-1.61)                                 | <0.001  |
| Hispanic                        | 1.27 (1.05-1.52)                                 | 0.011   |
| Interaction term for race       | -                                                | 0.580   |
| BMI $\geq$ 30 kg/m <sup>2</sup> | 1.39 (1.18-1.64)                                 | <0.001  |
| BMI<30 kg/m <sup>2</sup>        | 1.49 (1.30-1.71)                                 | <0.001  |
| BMI $\geq$ 25 kg/m <sup>2</sup> | 1.28 (1.16-1.41)                                 | <0.001  |
| BMI<25 kg/m <sup>2</sup>        | 1.44 (1.07-1.94)                                 | 0.015   |
| Se creatinine $\geq$ 10 mg/dl   | 1.36 (1.25-1.48)                                 | <0.001  |
| Se creatinine < 10 mg/dl        | 1.38 (1.24-1.53)                                 | <0.001  |
| Interaction term for creatinine | -                                                | 0.376   |
| Hemoglobin $\geq$ 11 g/dl       | 1.36 (1.26-1.46)                                 | <0.001  |
| Hemoglobin <11 g/dl             | 1.44 (1.20-1.72)                                 | <0.001  |
| Interaction term for hemoglobin | -                                                | 0.980   |
| EDC kidney                      | 1.58 (1.32-1.89)                                 | <0.001  |
| Non EDC kidney                  | 1.31 (1.20-1.42)                                 | <0.001  |
| Interaction term for EDC        | -                                                | 0.039   |
| Living donor                    | 1.33 (1.14-1.56)                                 | <0.001  |
| Deceased donor                  | 1.36 (1.26-1.46)                                 | <0.001  |

|                                 |   |       |
|---------------------------------|---|-------|
| Interaction term for donor type | - | 0.877 |
|---------------------------------|---|-------|

**Figure legends:**

**Figure S1:** Multivariate analysis of logistic regression models showing pre-transplant BMI and OR (and 95% CI as error bars) of delayed graft function in our fully models using cubic spline curve in 11,836 kidney transplanted patients.

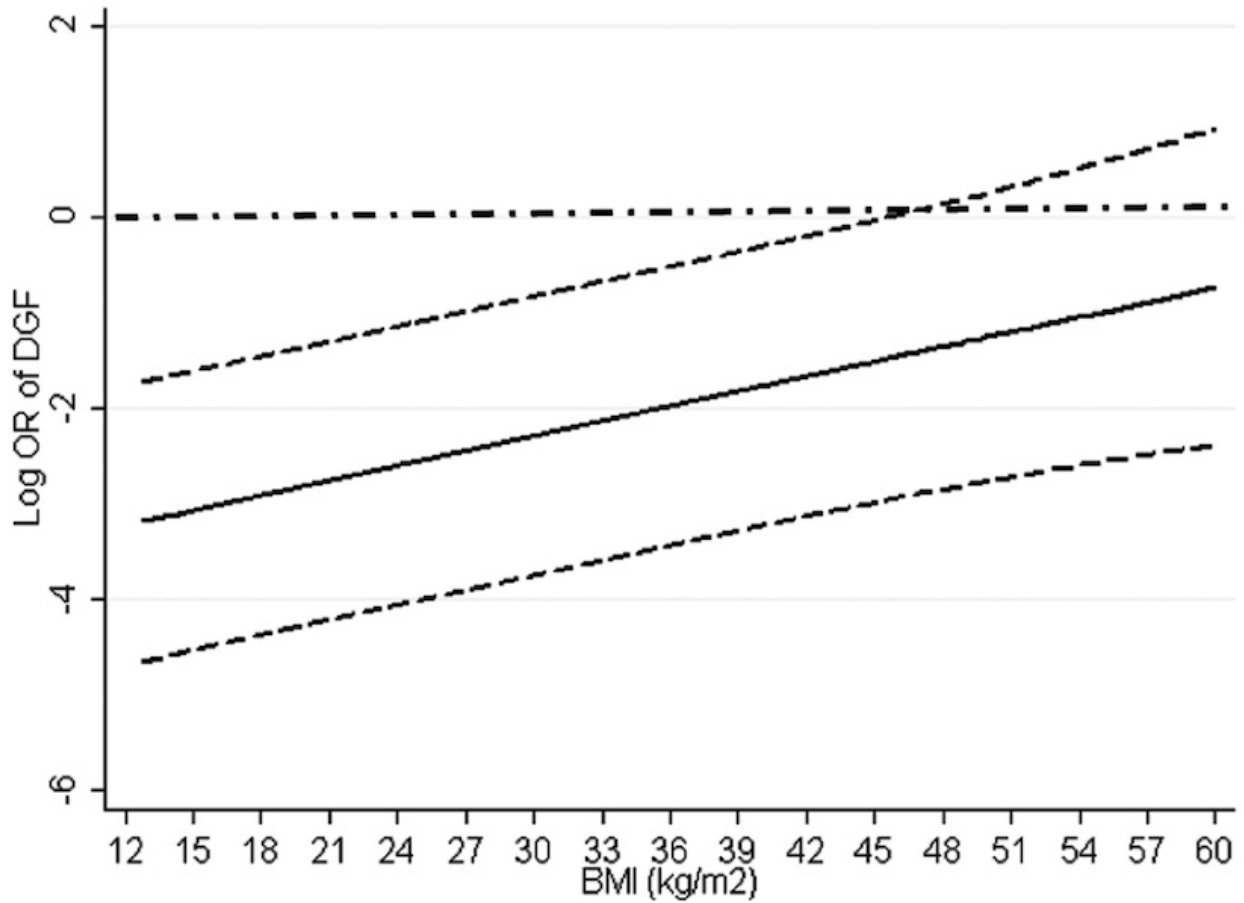

**Figure S2:** Multivariate analysis of logistic regression models showing pre-transplant BMI and OR (and 95% CI as error bars) of delayed graft function in four different models (Reference: BMI 22-<25 kg/m<sup>2</sup>) (A) and the fully adjusted model using cubic spline curve (B) in 13,798 kidney transplanted patients.

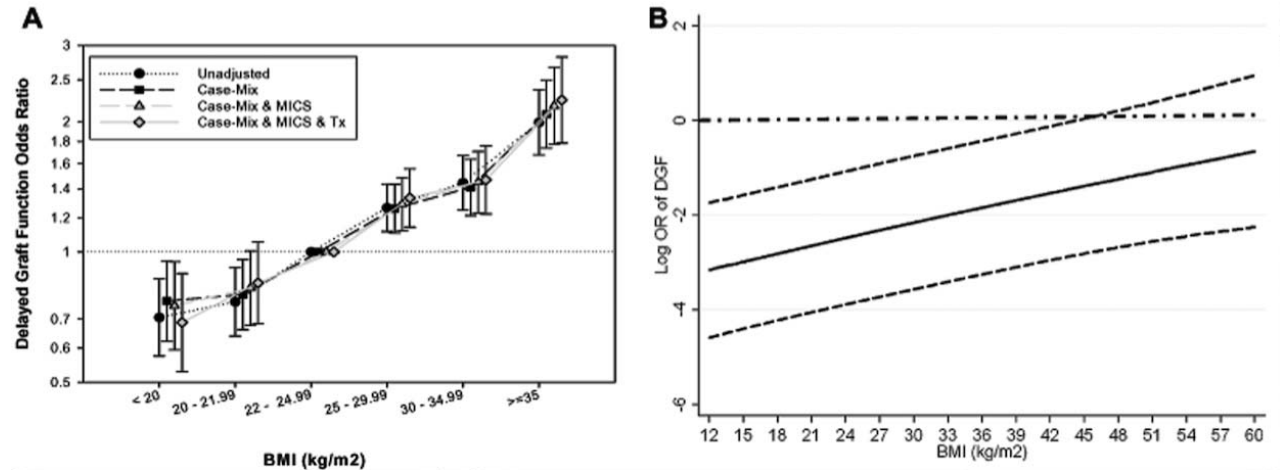

Supplement: NIHMS321984-supplement-supplement_1.pdf [file NIHMS321984-supplement-supplement_1.pdf]
